# Supplementary material
Source: Springer Nature journal article supplement (https://www.springermedizin.de/resource/supplementary/12871_2013_211_MOESM3_ESM.pdf/9429142)

# Use of postoperative NSAID as p.r.n.

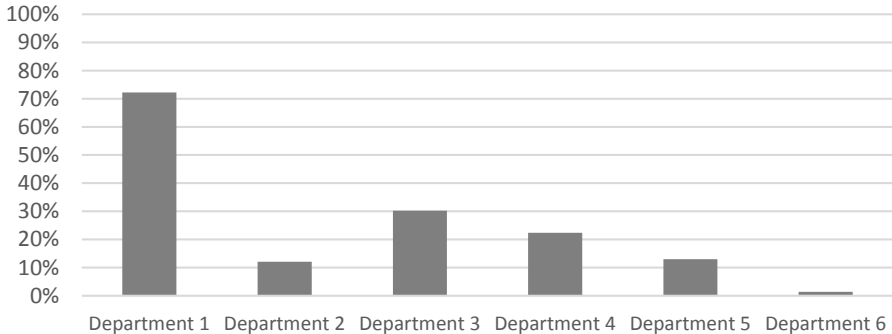

Supplement: MOESM3 [file 9429142]
